# Supplementary material
Source: PubMed Central journal article supplement (PMC1167553)
Supplement: plntcell_tpc.105.033548_1.pdf [file plntcell_tpc.105.033548_1.pdf]

Supplementary Table 1: Metabolites (nmol gFW<sup>-1</sup>) of the glycolytic sequence in antisense *StUMPS* transgenic tubers. Metabolites were determined in the same samples from developing tubers used for the nucleotide determinations presented in Figure 2. The data are presented as the mean  $\pm$  SE of determinations on six individual plants per line. G6P, glucose 6-phosphate; G1P, glucose 1-phosphate; F6P, fructose 6-phosphate; 3-PGA, 3-phosphoglycerate; FBP, fructose 1,6-bisphosphate; PEP, phosphoenolpyruvate; Pyr, pyruvate. Values were tested for significant differences from the wild type via the performance of by *t*-tests.

|          | WT             | B33-8          | B33-76         | B33-73         |
|----------|----------------|----------------|----------------|----------------|
| G6P      | 178 $\pm$ 9    | 152 $\pm$ 16   | 181 $\pm$ 12   | 196 $\pm$ 6    |
| G1P      | 10.6 $\pm$ 0.3 | 10.5 $\pm$ 1.4 | 10.6 $\pm$ 1.0 | 12.1 $\pm$ 0.9 |
| F6P      | 43 $\pm$ 2     | 49 $\pm$ 3     | 45 $\pm$ 4     | 38 $\pm$ 4     |
| 3-PGA    | 91 $\pm$ 5     | 92 $\pm$ 7     | 103 $\pm$ 9    | 98 $\pm$ 4     |
| Triose P | 2.6 $\pm$ 0.4  | 2.9 $\pm$ 0.3  | 2.9 $\pm$ 0.4  | 3.0 $\pm$ 0.3  |
| FBP      | 1.0 $\pm$ 0.2  | 1.0 $\pm$ 0.1  | 1.3 $\pm$ 0.3  | 0.9 $\pm$ 0.2  |
| PEP      | 33.2 $\pm$ 0.8 | 35.2 $\pm$ 3.0 | 41.2 $\pm$ 4.4 | 33.1 $\pm$ 1.5 |
| Pyr      | 5.1 $\pm$ 0.8  | 5.4 $\pm$ 0.7  | 7.2 $\pm$ 0.9  | 5.0 $\pm$ 0.8  |
